# Supplementary material
Source: Springer Nature journal article supplement (https://www.springermedizin.de/resource/supplementary/13075_2009_3014_MOESM7_ESM.pdf/9693346)

**A**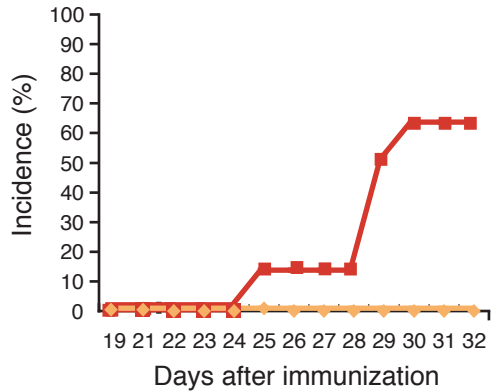**B**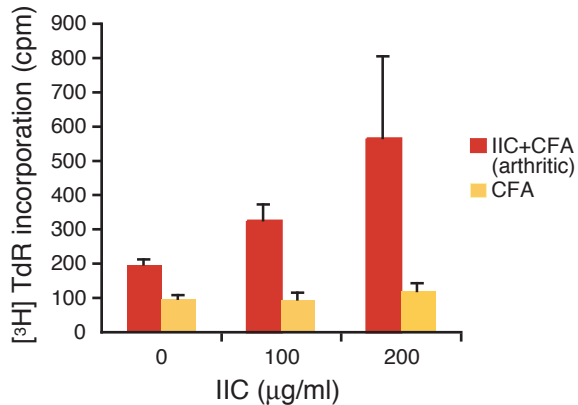

Supplement: MOESM7 [file 9693346]
